# Supplementary material for: Metal Oxide Thin Films Prepared by Magnetron Sputtering Technology for Volatile Organic Compound Detection in the Microwave Frequency Range
Source: MDPI journal article supplement (doi:10.3390/ma12060877), 2019-03-15
Supplement: s1 [file s1]

## Supplementary Materials

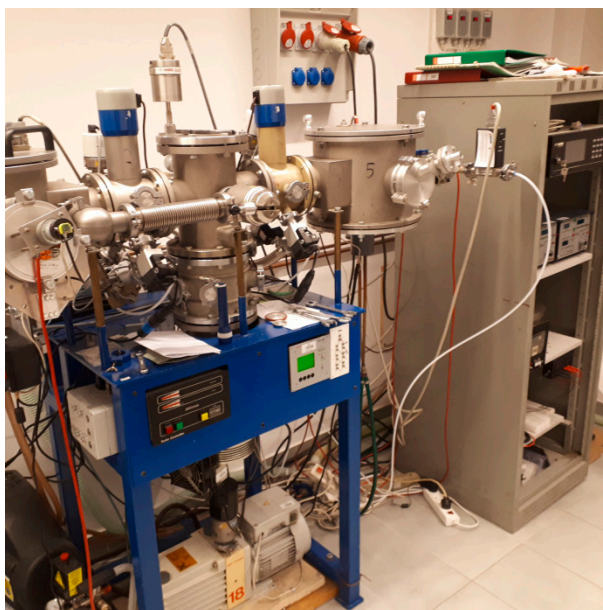

**Figure S1.** The copper oxide deposition system based on the magnetron sputtering technology.

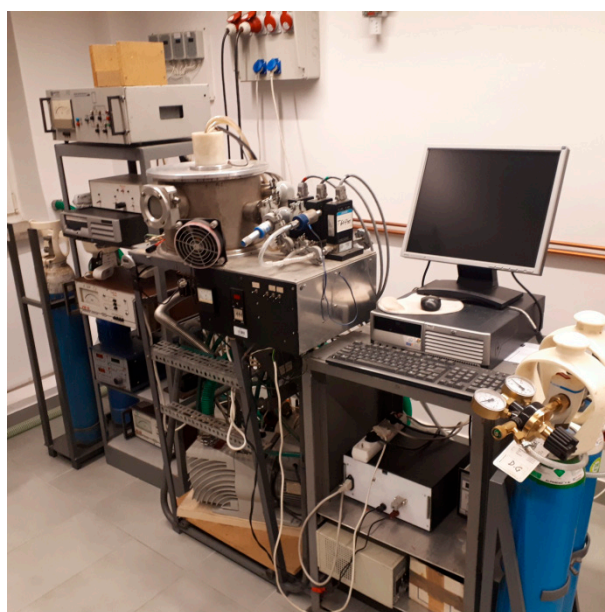

**Figure S2.** The titanium dioxide deposition system based on the magnetron sputtering technology.

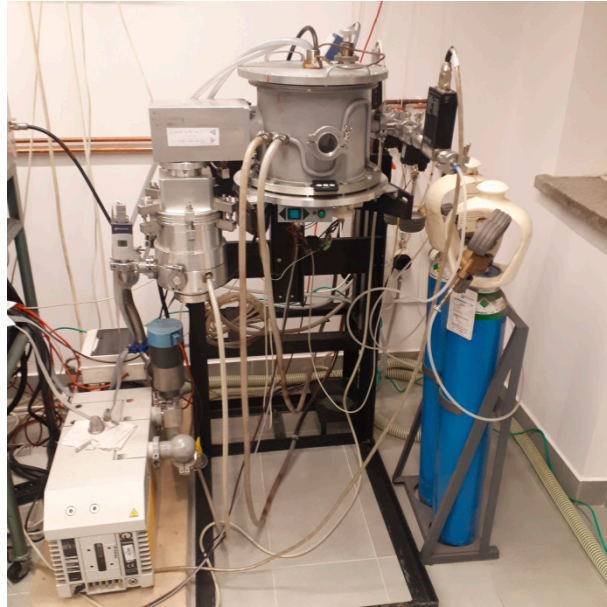

**Figure S3.** Tin dioxide deposition system based on the magnetron sputtering technology
